# Supplementary material for: Two-dimensional FTIR correlation spectroscopy reveals chemical changes in dissolved organic matter during the biodrying process of raw sludge and anaerobically digested sludge
Source: Royal Society of Chemistry journal article supplement (doi:10.1039/c5ra13069g), 2015-01-01
Supplement: c5ra13069g1.pdf [file c5ra13069g1.pdf]

1 Supplementary Material

2

3 Two-dimensional FTIR correlation spectroscopy reveals chemical  
4 changes in dissolved organic matter during the biodrying process of raw  
5 sludge and anaerobically digested sludge

6

7 Xiaowei Li, Xiaohu Dai\*, Lingling Dai, Zhigang Liu

8

9 State Key Laboratory of Pollution Control and Resources Reuse, National  
10 Engineering Research Center for Urban Pollution Control, School of Environmental  
11 Science and Engineering, Tongji University, 1239 Siping Road, Shanghai 200092,  
12 PR China

13

14 \*corresponding author, e-mail: daixiaohu@tongji.edu.cn (Dai X);

15 lixiaowei419@163.com (Li X)

16

17

18 The Number of Pages: 4

19 The Number of Tables: 1

20 The Number of Figures: 2

21

22

23 **Materials and methods**

24 **Organic elemental analysis of the matrices**

25 C, N and H contents of the freeze-dried samples were measured by an element  
26 analyzer (Vario EL III, Elementar, Germany).

27 **Volatile fatty acid (VFA) contents of DOMs**

28 Volatile fatty acid (VFA) contents were analyzed according to the method <sup>1</sup>.

29 Table S1 the characteristics of the raw materials

| Parameters                               | Raw sludge (RS) | Anaerobically digested sludge (ADS) | Wheat residues (WR) |
|------------------------------------------|-----------------|-------------------------------------|---------------------|
| Water content (Wet basis, %)             | 77.45±0.34      | 78.23±0.43                          | 11.60±0.27          |
| VS content (dry basis, %)                | 56.51±0.28      | 38.97±0.15                          | 93.28±0.42          |
| C content (dry basis, %)                 | 32.97±0.25      | 19.85±0.18                          | 42.19±0.19          |
| N content (dry basis, %)                 | 4.25±0.09       | 2.58±0.12                           | 3.50±0.14           |
| H content (dry basis, %)                 | 5.57±0.15       | 3.95±0.13                           | 6.97±0.17           |
| C/N ratio                                | 10.34           | 10.26                               | 16.07               |
| Calorific value (MJ Kg <sup>-1</sup> VS) | 26.63±0.05      | 22.37±0.08                          | 17.69±0.11          |

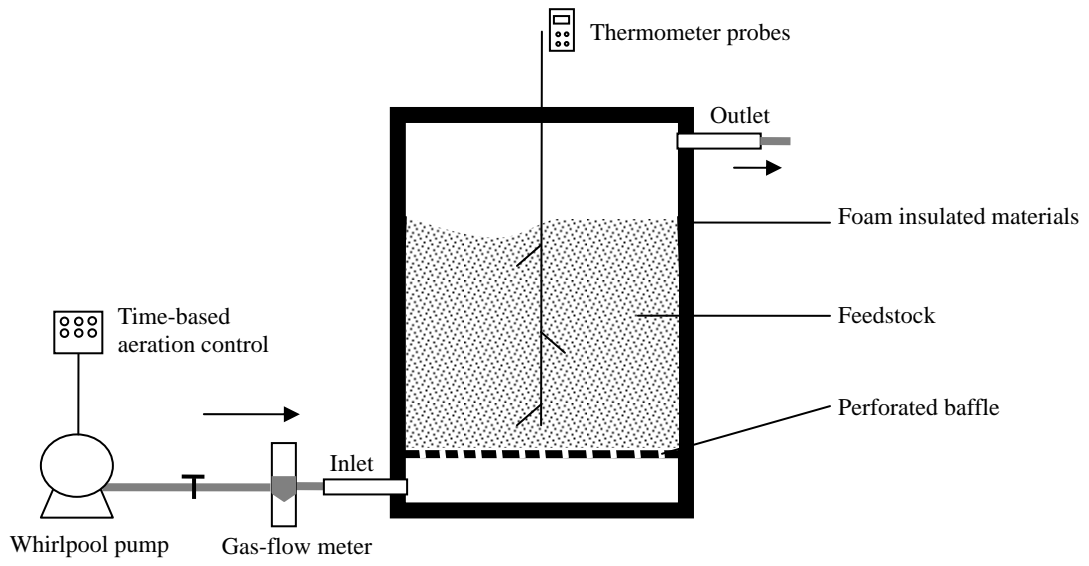

30

31

32 Fig. S1 the schematic diagram of the bio-drying system

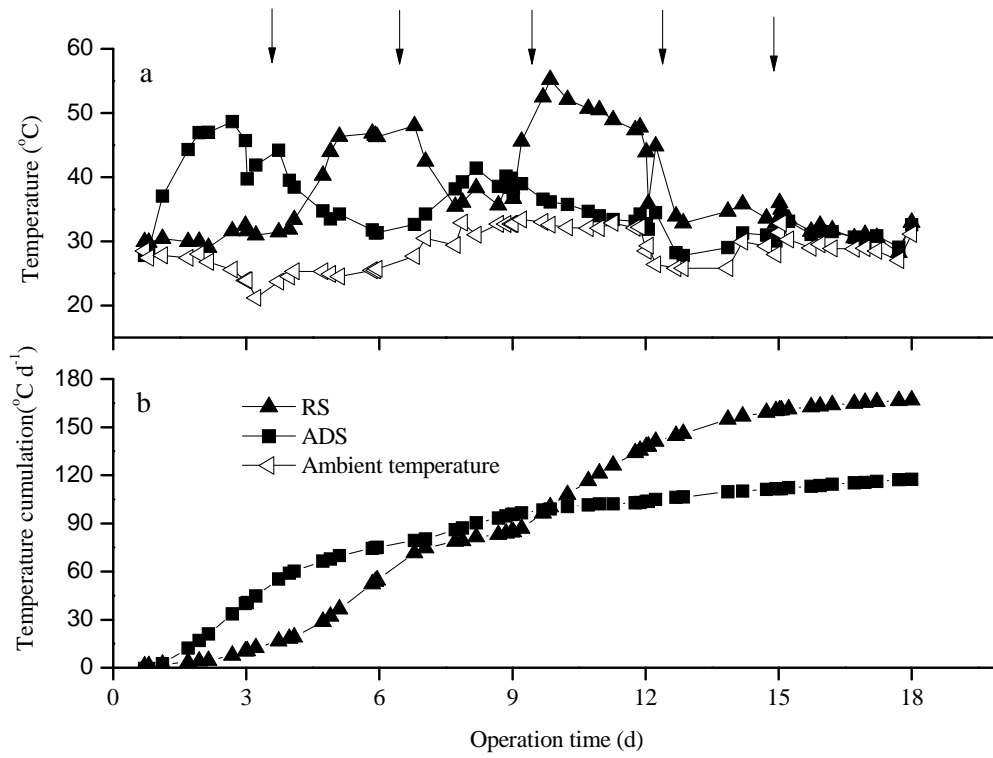

33

34 Figure S2 Temporal evolutions of average temperature (a) and temperature cumulation (b) in the

35 matrixes during bio-drying process

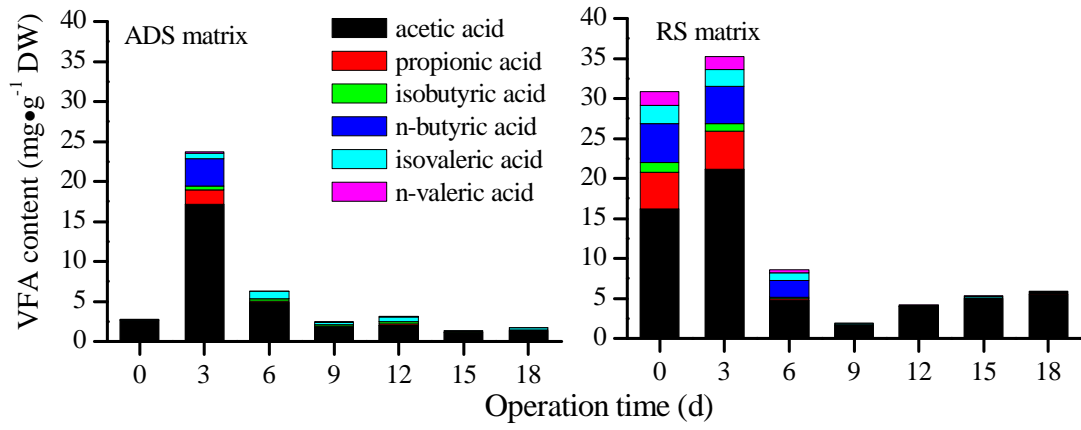

36

37 Fig. S3 Contents of volatile fatty acids in the DOMs during the bio-drying process of ADS and

38 RS matrices

39 **References**

- 40 1. X. Li, X. Dai, J. Takahashi, N. Li, J. Jin, L. Dai and B. Dong, *Bioresour. Technol.*, 2014, **159**,  
41 412-420.

42

43
